# Supplementary material for: COVID-19 Disease in Pediatric Solid Organ Transplantation from Alpha to Omicron: A High Monocyte Count in the Preceding Three Months Portends a Risk for Severe Disease
Source: MDPI journal article supplement (doi:10.3390/v15071559), 2023-07-16
Supplement: s1 [file s1]

**Supplemental Figure 1.** Pearson's Correlations among the observed levels of NK cell number and frequency before infection, CRP, LDH, ferritin, absolute monocyte and lymphocyte count at time of infection were computed. Blue boxes indicate a positive correlation and brown boxes indicate a negative correlation. All correlations were significant with  $p < 0.01$ .
